# Supplementary material for: A molecular dynamics investigation of drug dissociation from SGLT and its implication in antidiabetic medication development
Source: Royal Society of Chemistry journal article supplement (doi:10.1039/d3nj03504b), 2023-01-01
Supplement: d3nj03504b1.pdf [file d3nj03504b1.pdf]

*Supplementary material for*

**A molecular dynamics investigation of drug  
dissociation from SGLT and its implication in  
antidiabetic medication development**

Ming-Hui Pang <sup>a</sup>, Xue-Feng Liu <sup>a,\*</sup>, Xin-Guan Tan <sup>a</sup>, Yu-Qing Wang <sup>a</sup>

<sup>a</sup> College of Mathematics and Physics, Chengdu University of Technology, Chengdu 610059, China

\*Correspondence: liuxuefeng17@cdut.edu.cn (X.-F.L.);

**Table S1.** Hydrogen bond analysis with the equilibrium trajectories of the alpha-glucose at SGLT2 site complex.

| Acceptor             | Donor                | Occupancy (%) | Average Distance(Å) | Average Angle(°) |
|----------------------|----------------------|---------------|---------------------|------------------|
| GLU99@OE2            | $\alpha$ -glucose@O3 | 73.39         | 2.68                | 165.00           |
| PHE98@O              | $\alpha$ -glucose@O6 | 65.92         | 2.75                | 158.43           |
| $\alpha$ -glucose@O3 | ASN75@ND2            | 29.99         | 2.89                | 162.85           |
| $\alpha$ -glucose@O2 | TRP291@NE1           | 17.96         | 2.90                | 153.95           |
| GLU99@OE1            | $\alpha$ -glucose@O3 | 16.22         | 2.69                | 162.51           |
| $\alpha$ -glucose@O2 | LYS321@NZ2           | 13.25         | 2.87                | 154.31           |
| $\alpha$ -glucose@O6 | $\alpha$ -glucose@O2 | 13.02         | 2.78                | 147.93           |
| $\alpha$ -glucose@O2 | LYS321@NZ1           | 12.19         | 2.87                | 153.46           |
| $\alpha$ -glucose@O2 | LYS321@NZ3           | 11.01         | 2.87                | 153.31           |
| $\alpha$ -glucose@O6 | ALA102@N             | 9.90          | 2.91                | 147.67           |
| ASN101@OD1           | $\alpha$ -glucose@O6 | 9.25          | 2.80                | 158.36           |
| ASN75@OD1            | $\alpha$ -glucose@O2 | 7.87          | 2.75                | 152.41           |
| GLU99@OE2            | $\alpha$ -glucose@O4 | 7.16          | 2.70                | 156.34           |
| GLU99@OE2            | $\alpha$ -glucose@O2 | 7.02          | 2.66                | 161.30           |
| $\alpha$ -glucose@O5 | TRP291@NE1           | 4.80          | 2.89                | 151.92           |
| $\alpha$ -glucose@O3 | HIE80@NE2            | 4.48          | 2.89                | 154.76           |
| SER287@OG            | $\alpha$ -glucose@O2 | 3.80          | 2.80                | 157.50           |
| $\alpha$ -glucose@O3 | LYS321@NZ1           | 2.70          | 2.86                | 150.36           |
| $\alpha$ -glucose@O6 | ASN101@ND2           | 2.31          | 2.89                | 163.74           |
| PHE98@O              | $\alpha$ -glucose@O3 | 1.99          | 2.75                | 158.50           |
| SER287@OG            | $\alpha$ -glucose@O3 | 1.95          | 2.82                | 159.83           |
| $\alpha$ -glucose@O3 | LYS321@NZ2           | 1.81          | 2.84                | 147.38           |
| $\alpha$ -glucose@O3 | LYS321@NZ3           | 1.80          | 2.84                | 148.44           |
| $\alpha$ -glucose@O5 | ASN75@ND2            | 1.69          | 2.91                | 153.37           |
| $\alpha$ -glucose@O4 | LYS321@NZ3           | 1.52          | 2.89                | 155.14           |
| PHE98@O              | $\alpha$ -glucose@O4 | 1.19          | 2.80                | 153.62           |
| ASN75@ND2            | $\alpha$ -glucose@O2 | 0.94          | 2.92                | 155.05           |
| SER287@OG            | $\alpha$ -glucose@O6 | 0.77          | 2.84                | 154.32           |
| PHE98@O              | $\alpha$ -glucose@O2 | 0.65          | 2.79                | 161.16           |
| $\alpha$ -glucose@O6 | TYR291@OH            | 0.63          | 2.79                | 163.19           |
| $\alpha$ -glucose@O4 | ASN75@ND2            | 0.52          | 2.90                | 147.58           |
| $\alpha$ -glucose@O6 | SER287@OG            | 0.48          | 2.76                | 160.00           |
| $\alpha$ -glucose@O2 | $\alpha$ -glucose@O6 | 0.42          | 2.76                | 150.25           |
| GLU99@OE1            | $\alpha$ -glucose@O2 | 0.41          | 2.77                | 154.84           |
| GLU99@OE1            | $\alpha$ -glucose@O4 | 0.39          | 2.76                | 151.68           |
| $\alpha$ -glucose@O4 | GLN457@NE2           | 0.34          | 2.88                | 159.09           |
| GLU99@O              | $\alpha$ -glucose@O2 | 0.29          | 2.85                | 149.00           |
| $\alpha$ -glucose@O2 | ASN75@ND2            | 0.21          | 2.91                | 146.14           |
| GLY79@O              | $\alpha$ -glucose@O5 | 0.21          | 2.84                | 149.00           |

---

|                      |                      |      |      |        |
|----------------------|----------------------|------|------|--------|
| GLU99@OE2            | $\alpha$ -glucose@O5 | 0.20 | 2.74 | 160.52 |
| $\alpha$ -glucose@O1 | TRP291@NE1           | 0.17 | 2.93 | 159.32 |
| GLU99@O              | $\alpha$ -glucose@O4 | 0.16 | 2.81 | 147.95 |
| $\alpha$ -glucose@O5 | LYS321@NZ3           | 0.13 | 2.89 | 143.34 |
| $\alpha$ -glucose@O6 | TRP291@NE1           | 0.11 | 2.91 | 149.24 |
| $\alpha$ -glucose@O1 | $\alpha$ -glucose@O6 | 0.06 | 2.60 | 136.94 |
| $\alpha$ -glucose@O4 | LYS321@NZ            | 0.06 | 2.84 | 144.36 |
| $\alpha$ -glucose@O4 | HIE80@NE2            | 0.06 | 2.87 | 151.68 |
| $\alpha$ -glucose@O6 | LYS321@NZ3           | 0.06 | 2.91 | 161.02 |
| $\alpha$ -glucose@O4 | LYS321@NZ2           | 0.05 | 2.86 | 156.80 |
| $\alpha$ -glucose@O4 | $\alpha$ -glucose@O5 | 0.05 | 2.73 | 137.65 |
| GLN457@OE1           | $\alpha$ -glucose@O4 | 0.04 | 2.72 | 157.20 |
| $\alpha$ -glucose@O6 | ASN101@ND2           | 0.04 | 2.87 | 161.69 |
| SER287@OG            | $\alpha$ -glucose@O5 | 0.04 | 2.86 | 156.85 |
| $\alpha$ -glucose@O6 | ASN101@N             | 0.04 | 2.94 | 139.86 |
| $\alpha$ -glucose@O3 | TRP291@NE1           | 0.04 | 2.94 | 160.54 |
| ASN65@OD1            | $\alpha$ -glucose@O4 | 0.03 | 2.85 | 162.12 |
| $\alpha$ -glucose@O6 | SER460@OG            | 0.03 | 2.85 | 162.61 |
| $\alpha$ -glucose@O3 | TYR290@OH            | 0.03 | 2.85 | 147.17 |
| SER460@OG            | $\alpha$ -glucose@O6 | 0.03 | 2.74 | 163.84 |
| ASN101@OD1           | $\alpha$ -glucose@O2 | 0.03 | 2.80 | 169.39 |
| ASN101@OD1           | $\alpha$ -glucose@O3 | 0.02 | 2.83 | 145.71 |
| GLN457@OE1           | $\alpha$ -glucose@O5 | 0.02 | 2.86 | 155.27 |
| $\alpha$ -glucose@O1 | GLN457@NE2           | 0.02 | 2.92 | 149.09 |
| $\alpha$ -glucose@O6 | LYS321@NZ1           | 0.01 | 2.88 | 156.81 |
| $\alpha$ -glucose@O6 | LYS321@NZ2           | 0.01 | 2.90 | 165.20 |
| $\alpha$ -glucose@O3 | $\alpha$ -glucose@O2 | 0.01 | 2.69 | 136.57 |
| $\alpha$ -glucose@O5 | $\alpha$ -glucose@O4 | 0.01 | 2.83 | 135.31 |
| ASN75@ND2            | $\alpha$ -glucose@O5 | 0.01 | 2.84 | 142.78 |
| $\alpha$ -glucose@O4 | LYS154@NZ            | 0.01 | 2.86 | 148.13 |
| $\alpha$ -glucose@O2 | HIE80@NE2            | 0.01 | 2.87 | 163.80 |
| GLN457@OE1           | $\alpha$ -glucose@O6 | 0.01 | 2.87 | 155.28 |

---

**Table S2.** Hydrogen bond analysis with the equilibrium trajectories of the beta-glucose at SGLT2 site complex.

| <b>Acceptor</b> | <b>Donor</b> | <b>Occupancy (%)</b> | <b>Average Distance(Å)</b> | <b>Average Angle(°)</b> |
|-----------------|--------------|----------------------|----------------------------|-------------------------|
| GLU99@OE2       | β-glucose@O3 | 59.49                | 2.66                       | 164.95                  |
| GLU99@OE2       | β-glucose@O4 | 35.40                | 2.64                       | 162.47                  |
| GLU99@OE1       | β-glucose@O4 | 28.30                | 2.64                       | 163.63                  |
| PHE98@O         | β-glucose@O4 | 27.51                | 2.74                       | 160.27                  |
| GLU99@OE1       | β-glucose@O3 | 24.20                | 2.67                       | 165.13                  |
| β-glucose@O2    | β-glucose@O6 | 20.83                | 2.77                       | 151.20                  |
| ASN101@OD1      | β-glucose@O5 | 7.80                 | 2.77                       | 158.46                  |
| β-glucose@O4    | LYS321@NZ1   | 7.30                 | 2.86                       | 155.05                  |
| β-glucose@O4    | LYS321@NZ3   | 7.13                 | 2.85                       | 156.04                  |
| β-glucose@O4    | LYS321@NZ2   | 6.68                 | 2.87                       | 154.63                  |
| β-glucose@O2    | ASN75@ND2    | 6.18                 | 2.90                       | 153.26                  |
| SER287@OG       | β-glucose@O6 | 5.77                 | 2.81                       | 159.69                  |
| GLN457@OE1      | β-glucose@O6 | 5.60                 | 2.75                       | 157.45                  |
| GLU99@OE2       | β-glucose@O2 | 4.94                 | 2.65                       | 164.48                  |
| ASN75@O         | β-glucose@O2 | 4.69                 | 2.83                       | 154.70                  |
| PHE98@O         | β-glucose@O5 | 4.09                 | 2.75                       | 159.43                  |
| GLU99@OE1       | β-glucose@O5 | 3.84                 | 2.71                       | 166.21                  |
| β-glucose@O6    | GLN457@NE2   | 3.84                 | 2.88                       | 160.20                  |
| ASN75@OD1       | β-glucose@O3 | 3.41                 | 2.72                       | 161.39                  |
| β-glucose@O3    | LYS321@NZ    | 2.69                 | 2.86                       | 146.27                  |
| β-glucose@O5    | GLN457@NE2   | 1.79                 | 2.90                       | 155.05                  |
| ASN75@OD1       | β-glucose@O2 | 1.77                 | 2.80                       | 157.34                  |
| β-glucose@O3    | LYS321@NZ2   | 1.58                 | 2.86                       | 146.85                  |
| β-glucose@O6    | GLN457@NE2   | 1.57                 | 2.89                       | 160.13                  |
| β-glucose@O3    | LYS321@NZ1   | 1.54                 | 2.85                       | 147.58                  |
| β-glucose@O6    | TYR290@OH    | 1.09                 | 2.80                       | 162.84                  |
| β-glucose@O6    | SER287@OG    | 0.86                 | 2.81                       | 163.98                  |
| β-glucose@O5    | ASN101@ND2   | 0.84                 | 2.91                       | 161.64                  |
| β-glucose@O2    | TYR290@OH    | 0.72                 | 2.81                       | 158.53                  |
| β-glucose@O4    | β-glucose@O5 | 0.66                 | 2.74                       | 137.94                  |
| β-glucose@O3    | HIE80@NE2    | 0.58                 | 2.87                       | 147.03                  |
| β-glucose@O6    | β-glucose@O2 | 0.38                 | 2.79                       | 147.15                  |
| β-glucose@O2    | LYS321@NZ2   | 0.37                 | 2.87                       | 141.93                  |
| β-glucose@O6    | ASN75@ND2    | 0.36                 | 2.90                       | 157.03                  |
| SER287@OG       | β-glucose@O5 | 0.34                 | 2.86                       | 158.66                  |
| β-glucose@O1    | GLN457@NE2   | 0.30                 | 2.90                       | 149.24                  |
| PHE98@O         | β-glucose@O3 | 0.29                 | 2.84                       | 154.04                  |
| TYR290@OH       | β-glucose@O6 | 0.18                 | 2.83                       | 161.60                  |
| β-glucose@O6    | SER460@OG    | 0.18                 | 2.85                       | 157.33                  |

---

|              |              |      |      |        |
|--------------|--------------|------|------|--------|
| β-glucose@O3 | ASN75@ND2    | 0.17 | 2.89 | 147.60 |
| β-glucose@O5 | SER287@OG    | 0.16 | 2.87 | 164.51 |
| β-glucose@O3 | TYR290@OH    | 0.15 | 2.78 | 165.77 |
| SER287@OG    | β-glucose@O4 | 0.14 | 2.80 | 154.63 |
| β-glucose@O6 | LYS154@NZ    | 0.14 | 2.87 | 147.58 |
| β-glucose@O2 | LYS321@NZ1   | 0.14 | 2.88 | 142.33 |
| ASN75@OD1    | β-glucose@O6 | 0.13 | 2.85 | 154.63 |
| ASN101@OD1   | β-glucose@O4 | 0.11 | 2.90 | 155.83 |
| β-glucose@O6 | LYS154@NZ    | 0.09 | 2.88 | 146.07 |
| β-glucose@O5 | ASN101@ND2   | 0.09 | 2.91 | 160.06 |
| GLN457@NE2   | β-glucose@O6 | 0.09 | 2.91 | 151.99 |
| β-glucose@O1 | β-glucose@O6 | 0.08 | 2.62 | 137.41 |
| β-glucose@O1 | SER287@OG    | 0.07 | 2.83 | 144.28 |
| β-glucose@O6 | LYS154@NZ    | 0.07 | 2.89 | 147.73 |
| β-glucose@O2 | LYS321@NZ3   | 0.06 | 2.88 | 140.63 |
| β-glucose@O4 | β-glucose@O3 | 0.06 | 2.72 | 137.35 |
| ASN75@O      | β-glucose@O3 | 0.06 | 2.80 | 143.69 |
| β-glucose@O1 | GLN457@NE2   | 0.06 | 2.89 | 146.23 |
| β-glucose@O2 | HIE80@NE2    | 0.05 | 2.86 | 145.02 |
| GLU99@OE1    | β-glucose@O2 | 0.04 | 2.77 | 140.08 |
| GLN457@OE1   | β-glucose@O5 | 0.04 | 2.86 | 154.90 |
| β-glucose@O4 | ALA102@N     | 0.04 | 2.87 | 145.09 |
| ASN75@O      | β-glucose@O6 | 0.03 | 2.81 | 148.21 |
| β-glucose@O5 | GLN457@NE2   | 0.02 | 2.90 | 149.81 |
| ASN75@OD1    | β-glucose@O5 | 0.02 | 2.92 | 150.03 |
| GLU99@O      | β-glucose@O3 | 0.02 | 2.92 | 144.42 |
| ASN75@ND2    | β-glucose@O2 | 0.02 | 2.90 | 141.26 |
| β-glucose@O2 | β-glucose@O3 | 0.01 | 2.72 | 139.71 |
| ASN75@ND2    | β-glucose@O3 | 0.01 | 2.82 | 164.19 |
| β-glucose@O4 | ASN75@ND2    | 0.01 | 2.96 | 138.03 |
| ASN75@OD1    | β-glucose@O4 | 0.01 | 2.70 | 168.72 |
| β-glucose@O4 | HIE80@NE2    | 0.01 | 2.81 | 154.07 |
| SER74@O      | β-glucose@O6 | 0.01 | 2.84 | 169.16 |
| TYR290@OH    | β-glucose@O2 | 0.01 | 2.85 | 166.68 |
| SER460@OG    | β-glucose@O6 | 0.01 | 2.93 | 151.74 |
| β-glucose@O2 | ASN75@ND2    | 0.01 | 2.97 | 147.10 |
| HIE80@ND1    | β-glucose@O2 | 0.01 | 2.98 | 154.37 |

---

**Table S3.** Hydrogen bond analysis with the equilibrium trajectories of the Empagliflozin at SGLT2 site complex.

| <b>Acceptor</b>  | <b>Donor</b>     | <b>Occupancy (%)</b> | <b>Average Distance(Å)</b> | <b>Average Angle(°)</b> |
|------------------|------------------|----------------------|----------------------------|-------------------------|
| GLU99@OE2        | Empagliflozin@O3 | 95.65                | 2.63                       | 165.44                  |
| PHE98@O          | Empagliflozin@O2 | 90.60                | 2.75                       | 162.02                  |
| SER287@OG        | Empagliflozin@O4 | 72.86                | 2.80                       | 153.94                  |
| GLN457@OE1       | Empagliflozin@O5 | 68.48                | 2.78                       | 161.19                  |
| Empagliflozin@O2 | TRP291@NE1       | 44.27                | 2.89                       | 161.03                  |
| Empagliflozin@O4 | TRP291@NE1       | 6.00                 | 2.89                       | 146.69                  |
| Empagliflozin@O3 | LYS321@NZ1       | 4.81                 | 2.89                       | 145.40                  |
| Empagliflozin@O3 | HIE80@NE2        | 4.37                 | 2.89                       | 153.72                  |
| Empagliflozin@O3 | LYS321@NZ2       | 3.93                 | 2.89                       | 145.08                  |
| Empagliflozin@O3 | LYS321@NZ3       | 3.65                 | 2.89                       | 144.90                  |
| Empagliflozin@O1 | GLN457@NE2       | 2.35                 | 2.92                       | 157.47                  |
| Empagliflozin@O7 | THR87@OG1        | 1.74                 | 2.87                       | 157.63                  |
| Empagliflozin@O2 | LYS321@NZ3       | 1.57                 | 2.89                       | 161.72                  |
| GLU99@OE1        | Empagliflozin@O3 | 0.62                 | 2.73                       | 161.84                  |
| Empagliflozin@O4 | SER287@OG        | 0.57                 | 2.74                       | 159.43                  |
| GLU99@OE2        | Empagliflozin@O2 | 0.38                 | 2.68                       | 159.73                  |
| Empagliflozin@O2 | LYS321@NZ2       | 0.37                 | 2.90                       | 160.78                  |
| PHE98@O          | Empagliflozin@O4 | 0.36                 | 2.80                       | 154.96                  |
| Empagliflozin@O2 | LYS321@NZ1       | 0.34                 | 2.89                       | 159.83                  |
| GLU99@OE1        | Empagliflozin@O2 | 0.27                 | 2.70                       | 161.38                  |
| Empagliflozin@O6 | TYR526@OH        | 0.25                 | 2.80                       | 147.77                  |
| ASN75@OD1        | Empagliflozin@O3 | 0.20                 | 2.76                       | 154.43                  |
| Empagliflozin@O3 | ASN75@ND2        | 0.20                 | 2.91                       | 163.06                  |
| Empagliflozin@O5 | GLN457@NE2       | 0.19                 | 2.90                       | 146.86                  |
| ASN75@O          | Empagliflozin@O3 | 0.10                 | 2.82                       | 151.26                  |
| Empagliflozin@O6 | THR87@OG1        | 0.08                 | 2.80                       | 163.27                  |
| SER287@OG        | Empagliflozin@O5 | 0.04                 | 2.85                       | 153.76                  |
| Empagliflozin@O3 | TYR290@OH        | 0.01                 | 2.85                       | 156.73                  |
| Empagliflozin@O1 | Empagliflozin@O5 | 0.01                 | 2.59                       | 136.44                  |
| Empagliflozin@O2 | ASN75@ND2        | 0.01                 | 2.88                       | 156.82                  |
| ASN101@OD1       | Empagliflozin@O4 | 0.01                 | 2.89                       | 161.70                  |

**Table S4.** Hydrogen bond analysis with the equilibrium trajectories of the Ertugliflozin at SGLT2 site complex.

| <b>Acceptor</b>  | <b>Donor</b>     | <b>Occupancy (%)</b> | <b>Average Distance(Å)</b> | <b>Average Angle(°)</b> |
|------------------|------------------|----------------------|----------------------------|-------------------------|
| HIE80@ND1        | Ertugliflozin@H2 | 58.90                | 2.85                       | 155.82                  |
| GLY79@O          | Ertugliflozin@H3 | 33.06                | 2.82                       | 154.19                  |
| Ertugliflozin@O1 | GLN457@HE22      | 29.22                | 2.86                       | 150.57                  |
| HIE80@O          | Ertugliflozin@H3 | 8.22                 | 2.82                       | 157.34                  |
| Ertugliflozin@O3 | Ertugliflozin@H4 | 7.95                 | 2.75                       | 149.77                  |
| Ertugliflozin@O6 | GLN457@HE22      | 2.17                 | 2.88                       | 156.63                  |
| PHE453@O         | Ertugliflozin@H1 | 2.09                 | 2.80                       | 158.16                  |
| PHE453@O         | Ertugliflozin@H4 | 0.78                 | 2.83                       | 158.49                  |
| Ertugliflozin@O3 | THR87@HG1        | 0.51                 | 2.88                       | 148.57                  |
| TYR526@OH        | Ertugliflozin@H4 | 0.44                 | 2.85                       | 152.98                  |
| Ertugliflozin@O6 | TYR526@HH        | 0.37                 | 2.83                       | 151.46                  |
| GLY83@O          | Ertugliflozin@H1 | 0.32                 | 2.87                       | 147.16                  |
| Ertugliflozin@O6 | Ertugliflozin@H1 | 0.31                 | 2.75                       | 146.74                  |
| Ertugliflozin@O1 | Ertugliflozin@H4 | 0.12                 | 2.66                       | 138.18                  |
| GLY79@O          | Ertugliflozin@H2 | 0.10                 | 2.83                       | 155.25                  |
| Ertugliflozin@O5 | GLN457@HE22      | 0.06                 | 2.93                       | 157.73                  |
| Ertugliflozin@O4 | Ertugliflozin@H3 | 0.02                 | 2.81                       | 137.27                  |
| Ertugliflozin@O7 | ASN75@HD22       | 0.02                 | 2.83                       | 155.06                  |
| THR87@OG1        | Ertugliflozin@H1 | 0.02                 | 2.90                       | 145.48                  |
| PHE453@O         | Ertugliflozin@H3 | 0.02                 | 2.73                       | 160.70                  |
| Ertugliflozin@O5 | GLN457@HE21      | 0.02                 | 2.93                       | 138.96                  |
| GLN457@NE2       | Ertugliflozin@H4 | 0.02                 | 2.93                       | 142.79                  |
| ASP454@OD1       | Ertugliflozin@H4 | 0.01                 | 2.73                       | 161.35                  |
| LEU84@N          | Ertugliflozin@H1 | 0.01                 | 2.94                       | 143.03                  |
| HIE80@NE2        | Ertugliflozin@H2 | 0.01                 | 2.95                       | 135.22                  |
| Ertugliflozin@O1 | GLN457@HE21      | 0.01                 | 2.97                       | 137.43                  |
| GLN457@OE1       | Ertugliflozin@H4 | 0.01                 | 2.99                       | 145.10                  |

**Table S5.** Hydrogen bond analysis with the equilibrium trajectories of the LX2761 at SGLT2 site complex.

| <b>Acceptor</b> | <b>Donor</b> | <b>Occupancy (%)</b> | <b>Average Distance(Å)</b> | <b>Average Angle(°)</b> |
|-----------------|--------------|----------------------|----------------------------|-------------------------|
| LX2761@O6       | ASN75@ND2    | 74.23                | 2.86                       | 164.43                  |
| LX2761@O6       | TYR290@OH    | 63.38                | 2.73                       | 160.71                  |
| ASP454@OD1      | LX2761@O2    | 27.22                | 2.68                       | 165.63                  |
| LX2761@O5       | LX2761@N2    | 25.07                | 2.78                       | 148.88                  |
| HIE80@ND1       | LX2761@N1    | 22.82                | 2.91                       | 150.67                  |
| LX2761@O5       | GLN457@NE2   | 19.96                | 2.85                       | 157.97                  |
| LX2761@N3       | TRP291@NE1   | 10.69                | 2.93                       | 157.57                  |
| GLN451@OE1      | LX2761@O4    | 10.16                | 2.74                       | 161.69                  |
| GLY509@O        | LX2761@O4    | 9.66                 | 2.74                       | 155.88                  |
| GLN457@OE1      | LX2761@N2    | 7.56                 | 2.83                       | 159.15                  |
| LX2761@O4       | GLN451@NE2   | 6.29                 | 2.90                       | 159.09                  |
| GLY509@O        | LX2761@O3    | 3.40                 | 2.73                       | 159.47                  |
| ASP454@OD2      | LX2761@O2    | 3.08                 | 2.69                       | 163.99                  |
| GLY450@O        | LX2761@O2    | 1.31                 | 2.77                       | 161.87                  |
| SER508@OG       | LX2761@O3    | 1.12                 | 2.82                       | 158.07                  |
| SER510@O        | LX2761@O3    | 1.06                 | 2.78                       | 154.86                  |
| SER510@O        | LX2761@O4    | 0.67                 | 2.81                       | 154.00                  |
| LX2761@O5       | GLN457@NE2   | 0.65                 | 2.89                       | 149.68                  |
| GLN451@OE1      | LX2761@O3    | 0.42                 | 2.73                       | 160.13                  |
| SER508@OG       | LX2761@O4    | 0.42                 | 2.85                       | 154.24                  |
| GLN451@OE1      | LX2761@O2    | 0.33                 | 2.77                       | 162.98                  |
| LX2761@O3       | GLN451@NE2   | 0.30                 | 2.90                       | 159.52                  |
| LX2761@O4       | SER510@N     | 0.26                 | 2.93                       | 150.67                  |
| LX2761@O3       | SER508@OG    | 0.20                 | 2.79                       | 161.87                  |
| GLY450@O        | LX2761@O4    | 0.16                 | 2.76                       | 162.21                  |
| LX2761@O2       | LX2761@O3    | 0.14                 | 2.72                       | 137.98                  |
| LX2761@O2       | GLN451@NE2   | 0.06                 | 2.95                       | 155.70                  |
| LX2761@O4       | SER508@OG    | 0.05                 | 2.79                       | 156.78                  |
| LX2761@O4       | GLY509@N     | 0.03                 | 2.97                       | 140.51                  |
| LX2761@O4       | GLN451@NE2   | 0.02                 | 2.91                       | 144.68                  |
| HIE80@ND1       | LX2761@N2    | 0.02                 | 2.97                       | 144.95                  |
| LX2761@O3       | GLY509@N     | 0.02                 | 2.86                       | 163.82                  |
| CYS511@O        | LX2761@O4    | 0.02                 | 2.90                       | 153.13                  |
| LX2761@O4       | SER510@OG    | 0.02                 | 2.93                       | 157.20                  |
| LX2761@N2       | ASN75@ND2    | 0.02                 | 2.93                       | 144.76                  |
| LX2761@O1       | THR87@OG1    | 0.01                 | 2.91                       | 153.59                  |
| LX2761@N1       | GLN457@NE2   | 0.01                 | 2.97                       | 139.05                  |
| LX2761@O3       | LX2761@O4    | 0.01                 | 2.77                       | 136.71                  |
| ASP454@OD1      | LX2761@O4    | 0.01                 | 2.84                       | 170.18                  |



**Table S6.** Hydrogen bond analysis with the equilibrium trajectories of the alpha-glucose at SGLT1 site complex.

| Acceptor             | Donor                | Occupancy (%) | Average Distance(Å) | Average Angle(°) |
|----------------------|----------------------|---------------|---------------------|------------------|
| ASP161@OD2           | $\alpha$ -glucose@O6 | 75.02         | 2.72                | 164.49           |
| ASN78@O              | $\alpha$ -glucose@O2 | 53.28         | 2.69                | 165.06           |
| ASN78@O              | $\alpha$ -glucose@O5 | 16.31         | 2.80                | 159.74           |
| THR156@O             | $\alpha$ -glucose@O4 | 15.77         | 2.77                | 160.75           |
| ASP161@OD1           | $\alpha$ -glucose@O6 | 13.40         | 2.72                | 163.54           |
| $\alpha$ -glucose@O2 | $\alpha$ -glucose@O3 | 11.82         | 2.68                | 139.54           |
| THR156@O             | $\alpha$ -glucose@O5 | 6.62          | 2.72                | 163.28           |
| $\alpha$ -glucose@O3 | TYR290@OH            | 4.01          | 2.81                | 161.91           |
| $\alpha$ -glucose@O6 | $\alpha$ -glucose@O2 | 3.90          | 2.75                | 147.71           |
| ASP161@OD1           | $\alpha$ -glucose@O2 | 2.77          | 2.62                | 167.65           |
| $\alpha$ -glucose@O6 | HIE83@N              | 2.61          | 2.91                | 142.43           |
| $\alpha$ -glucose@O6 | GLY82@N              | 1.66          | 2.91                | 140.23           |
| ASP161@OD2           | $\alpha$ -glucose@O2 | 1.63          | 2.61                | 167.65           |
| HIE83@ND1            | $\alpha$ -glucose@O2 | 1.61          | 2.83                | 160.23           |
| $\alpha$ -glucose@O2 | TYR290@OH            | 1.57          | 2.79                | 149.79           |
| $\alpha$ -glucose@O3 | LYS157@NZ2           | 1.16          | 2.83                | 156.55           |
| $\alpha$ -glucose@O3 | LYS157@NZ3           | 0.87          | 2.87                | 154.15           |
| TYR290@OH            | $\alpha$ -glucose@O3 | 0.85          | 2.88                | 144.94           |
| HIE83@ND1            | $\alpha$ -glucose@O3 | 0.67          | 2.88                | 146.73           |
| $\alpha$ -glucose@O3 | LYS157@NZ1           | 0.60          | 2.85                | 155.96           |
| $\alpha$ -glucose@O4 | $\alpha$ -glucose@O3 | 0.43          | 2.73                | 138.91           |
| $\alpha$ -glucose@O4 | $\alpha$ -glucose@O5 | 0.31          | 2.72                | 137.76           |
| GLY82@O              | $\alpha$ -glucose@O3 | 0.11          | 2.85                | 144.54           |
| $\alpha$ -glucose@O5 | TYR290@OH            | 0.11          | 2.87                | 157.81           |
| $\alpha$ -glucose@O5 | ASN78@ND2            | 0.09          | 2.89                | 150.39           |
| ASN78@O              | $\alpha$ -glucose@O6 | 0.07          | 2.80                | 151.54           |
| GLY82@O              | $\alpha$ -glucose@O5 | 0.05          | 2.74                | 165.86           |
| THR156@O             | $\alpha$ -glucose@O3 | 0.04          | 2.87                | 142.31           |
| HIE83@ND1            | $\alpha$ -glucose@O5 | 0.04          | 2.91                | 153.02           |
| $\alpha$ -glucose@O2 | GLY82@N              | 0.04          | 2.95                | 139.93           |
| $\alpha$ -glucose@O2 | ASN78@ND2            | 0.03          | 2.95                | 140.80           |
| $\alpha$ -glucose@O3 | GLN457@NE2           | 0.01          | 2.87                | 162.07           |
| ASN78@ND2            | $\alpha$ -glucose@O3 | 0.01          | 2.93                | 138.87           |
| $\alpha$ -glucose@O5 | $\alpha$ -glucose@O4 | 0.01          | 2.65                | 136.56           |
| TYR290@OH            | $\alpha$ -glucose@O2 | 0.01          | 2.73                | 138.74           |
| GLU102@OE2           | $\alpha$ -glucose@O4 | 0.01          | 2.82                | 164.20           |
| ASN78@ND2            | $\alpha$ -glucose@O5 | 0.01          | 2.84                | 173.10           |
| $\alpha$ -glucose@O2 | LYS157@NZ3           | 0.01          | 2.85                | 152.24           |
| $\alpha$ -glucose@O1 | TYR290@OH            | 0.01          | 2.86                | 147.63           |

---

|                      |                      |      |      |        |
|----------------------|----------------------|------|------|--------|
| $\alpha$ -glucose@O3 | ASN78@ND2            | 0.01 | 2.89 | 135.25 |
| ASN78@O              | $\alpha$ -glucose@O3 | 0.01 | 2.93 | 160.17 |
| ASN78@ND2            | $\alpha$ -glucose@O2 | 0.01 | 2.93 | 142.00 |
| HIE83@N              | $\alpha$ -glucose@O3 | 0.01 | 2.94 | 135.60 |
| $\alpha$ -glucose@O2 | HIE83@N              | 0.01 | 2.96 | 136.17 |
| $\alpha$ -glucose@O4 | LYS157@NZ3           | 0.01 | 2.98 | 137.66 |

---

**Table S7.** Hydrogen bond analysis with the equilibrium trajectories of the beta-glucose at SGLT1 site complex.

| <b>Acceptor</b> | <b>Donor</b> | <b>Occupancy (%)</b> | <b>Average Distance(Å)</b> | <b>Average Angle(°)</b> |
|-----------------|--------------|----------------------|----------------------------|-------------------------|
| GLU102@OE1      | β-glucose@O5 | 83.41                | 2.65                       | 165.22                  |
| β-glucose@O6    | TRP291@NE1   | 26.12                | 2.90                       | 160.74                  |
| GLN457@OE1      | β-glucose@O4 | 18.90                | 2.72                       | 157.37                  |
| GLU102@OE1      | β-glucose@O4 | 11.36                | 2.65                       | 164.99                  |
| GLN457@OE1      | β-glucose@O3 | 10.47                | 2.75                       | 157.16                  |
| β-glucose@O6    | LYS321@NZ1   | 9.82                 | 2.88                       | 151.80                  |
| β-glucose@O6    | LYS321@NZ2   | 8.06                 | 2.88                       | 151.41                  |
| β-glucose@O4    | GLN457@NE2   | 6.69                 | 2.87                       | 157.40                  |
| β-glucose@O6    | LYS321@NZ3   | 6.68                 | 2.88                       | 149.13                  |
| THR460@OG1      | β-glucose@O5 | 6.02                 | 2.78                       | 160.89                  |
| GLU102@OE2      | β-glucose@O5 | 4.49                 | 2.71                       | 153.89                  |
| GLN457@OE1      | β-glucose@O2 | 4.49                 | 2.77                       | 160.12                  |
| β-glucose@O1    | ASN78@ND2    | 3.62                 | 2.91                       | 158.42                  |
| β-glucose@O5    | LYS157@NZ    | 1.90                 | 2.84                       | 156.18                  |
| β-glucose@O1    | LYS321@NZ3   | 1.60                 | 2.91                       | 144.76                  |
| β-glucose@O5    | LYS157@NZ    | 1.24                 | 2.84                       | 155.32                  |
| GLU102@OE1      | β-glucose@O3 | 1.23                 | 2.75                       | 156.82                  |
| β-glucose@O1    | LYS157@NZ    | 1.23                 | 2.83                       | 150.32                  |
| HIE83@ND1       | β-glucose@O6 | 0.94                 | 2.87                       | 156.09                  |
| β-glucose@O5    | LYS157@NZ    | 0.90                 | 2.84                       | 154.18                  |
| β-glucose@O3    | GLN457@NE2   | 0.89                 | 2.91                       | 159.19                  |
| β-glucose@O5    | ASN78@ND2    | 0.89                 | 2.92                       | 159.24                  |
| β-glucose@O6    | LYS157@NZ    | 0.86                 | 2.84                       | 150.76                  |
| β-glucose@O1    | LYS157@NZ    | 0.84                 | 2.85                       | 152.17                  |
| HIE83@ND1       | β-glucose@O2 | 0.71                 | 2.89                       | 159.72                  |
| β-glucose@O1    | LYS321@NZ1   | 0.67                 | 2.92                       | 144.25                  |
| β-glucose@O1    | LYS157@NZ    | 0.60                 | 2.85                       | 149.91                  |
| ASN78@O         | β-glucose@O6 | 0.51                 | 2.76                       | 157.31                  |
| β-glucose@O5    | HIE83@NE2    | 0.49                 | 2.86                       | 152.40                  |
| β-glucose@O6    | LYS157@NZ3   | 0.45                 | 2.87                       | 152.52                  |
| β-glucose@O6    | LYS157@NZ2   | 0.31                 | 2.87                       | 150.68                  |
| β-glucose@O1    | LYS321@NZ1   | 0.29                 | 2.91                       | 146.68                  |
| LEU286@O        | β-glucose@O6 | 0.24                 | 2.88                       | 157.72                  |
| GLN457@OE1      | β-glucose@O5 | 0.22                 | 2.71                       | 161.11                  |
| GLY82@O         | β-glucose@O3 | 0.21                 | 2.77                       | 146.93                  |
| β-glucose@O5    | GLN457@NE2   | 0.12                 | 2.91                       | 150.87                  |
| THR287@OG1      | β-glucose@O6 | 0.09                 | 2.76                       | 162.00                  |
| GLY82@O         | β-glucose@O2 | 0.07                 | 2.77                       | 153.83                  |
| β-glucose@O4    | GLN457@NE2   | 0.07                 | 2.87                       | 158.15                  |

---

|                     |                     |      |      |        |
|---------------------|---------------------|------|------|--------|
| $\beta$ -glucose@O1 | $\beta$ -glucose@O6 | 0.05 | 2.61 | 137.49 |
| GLN457@NE2          | $\beta$ -glucose@O4 | 0.05 | 2.89 | 156.89 |
| $\beta$ -glucose@O4 | THR460@OG1          | 0.04 | 2.79 | 153.51 |
| LEU286@O            | $\beta$ -glucose@O2 | 0.04 | 2.85 | 140.51 |
| $\beta$ -glucose@O4 | $\beta$ -glucose@O3 | 0.03 | 2.70 | 137.09 |
| $\beta$ -glucose@O6 | ASN78@ND2           | 0.03 | 2.93 | 160.61 |
| $\beta$ -glucose@O5 | LYS321@NZ3          | 0.03 | 2.93 | 138.73 |
| GLU102@OE2          | $\beta$ -glucose@O4 | 0.02 | 2.85 | 139.65 |
| $\beta$ -glucose@O2 | LYS157@NZ1          | 0.02 | 2.86 | 148.87 |
| HIE83@ND1           | $\beta$ -glucose@O5 | 0.02 | 2.85 | 151.87 |
| $\beta$ -glucose@O2 | LYS157@NZ2          | 0.01 | 2.82 | 155.62 |
| $\beta$ -glucose@O5 | LYS321@NZ1          | 0.01 | 2.93 | 138.12 |
| GLU102@OE1          | $\beta$ -glucose@O6 | 0.01 | 2.72 | 156.02 |
| $\beta$ -glucose@O4 | $\beta$ -glucose@O5 | 0.01 | 2.77 | 135.59 |
| THR460@OG1          | $\beta$ -glucose@O4 | 0.01 | 2.80 | 145.95 |
| $\beta$ -glucose@O3 | $\beta$ -glucose@O2 | 0.01 | 2.85 | 135.86 |
| ASN78@ND2           | $\beta$ -glucose@O6 | 0.01 | 2.90 | 152.10 |
| $\beta$ -glucose@O4 | HIE83@NE2           | 0.01 | 2.90 | 147.30 |
| $\beta$ -glucose@O2 | GLN457@NE2          | 0.01 | 2.91 | 146.52 |
| SER461@OG           | $\beta$ -glucose@O6 | 0.01 | 2.91 | 146.58 |
| $\beta$ -glucose@O5 | THR156@OG1          | 0.01 | 2.92 | 163.98 |
| $\beta$ -glucose@O6 | GLY80@N             | 0.01 | 2.93 | 148.11 |
| HIE83@NE2           | $\beta$ -glucose@O5 | 0.01 | 2.93 | 142.08 |
| $\beta$ -glucose@O2 | LYS157@NZ3          | 0.01 | 2.95 | 156.56 |

---

**Table S8.** Hydrogen bond analysis with the equilibrium trajectories of the LX2761 at SGLT1 site complex.

| <b>Acceptor</b> | <b>Donor</b> | <b>Occupancy (%)</b> | <b>Average Distance(Å)</b> | <b>Average Angle(°)</b> |
|-----------------|--------------|----------------------|----------------------------|-------------------------|
| PHE101@O        | LX2761@O4    | 70.21                | 2.81                       | 164.20                  |
| THR287@OG1      | LX2761@O3    | 69.00                | 2.81                       | 151.00                  |
| LX2761@O2       | GLN457@NE2   | 49.27                | 2.89                       | 159.25                  |
| LX2761@O1       | HIE83@NE2    | 39.97                | 2.89                       | 154.72                  |
| LX2761@O4       | TRP291@NE1   | 28.23                | 2.91                       | 159.68                  |
| LX2761@O5       | SER94@OG     | 24.49                | 2.77                       | 159.12                  |
| ASP454@OD1      | LX2761@N1    | 22.15                | 2.87                       | 164.95                  |
| LX2761@O6       | SER94@OG     | 4.64                 | 2.80                       | 152.53                  |
| ASP454@OD2      | LX2761@N1    | 2.57                 | 2.88                       | 163.65                  |
| LX2761@O3       | LX2761@O2    | 1.31                 | 2.72                       | 137.72                  |
| GLN457@OE1      | LX2761@O2    | 1.27                 | 2.82                       | 152.59                  |
| LX2761@O6       | GLN451@NE2   | 0.82                 | 2.86                       | 157.74                  |
| LX2761@N3       | THR362@OG1   | 0.28                 | 2.88                       | 151.00                  |
| GLU102@OE2      | LX2761@O4    | 0.21                 | 2.74                       | 161.15                  |
| LX2761@O6       | GLN451@NE2   | 0.07                 | 2.90                       | 159.28                  |
| LX2761@O3       | THR287@OG1   | 0.05                 | 2.88                       | 164.43                  |
| LX2761@O4       | THR287@OG1   | 0.04                 | 2.80                       | 162.30                  |
| PHE101@O        | LX2761@O3    | 0.02                 | 2.82                       | 158.10                  |
| GLN457@NE2      | LX2761@O2    | 0.02                 | 2.90                       | 146.80                  |
| LX2761@N3       | GLN451@NE22  | 0.02                 | 2.93                       | 158.62                  |
| LX2761@N3       | GLN451@NE21  | 0.01                 | 2.94                       | 158.21                  |
| ASP273@OD2      | LX2761@N2    | 0.01                 | 2.75                       | 146.56                  |
| LX2761@O5       | LX2761@N2    | 0.01                 | 2.76                       | 142.31                  |
| LX2761@O6       | THR90@OG1    | 0.01                 | 2.78                       | 163.72                  |
| LX2761@N3       | ASN363@ND2   | 0.01                 | 2.90                       | 135.22                  |
| LX2761@N2       | GLN451@NE2   | 0.01                 | 2.97                       | 147.80                  |
| LX2761@O2       | GLN457@NE2   | 0.01                 | 2.98                       | 144.36                  |

**Table S9.** Hydrogen bond analysis with the equilibrium trajectories of the Empagliflozin at SGLT1 site complex.

| <b>Acceptor</b>  | <b>Donor</b>     | <b>Occupancy (%)</b> | <b>Average Distance(Å)</b> | <b>Average Angle(°)</b> |
|------------------|------------------|----------------------|----------------------------|-------------------------|
| GLU102@OE2       | Empagliflozin@O3 | 96.47                | 2.63                       | 165.53                  |
| PHE101@O         | Empagliflozin@O2 | 86.98                | 2.72                       | 161.16                  |
| THR287@OG1       | Empagliflozin@O4 | 84.61                | 2.79                       | 157.16                  |
| Empagliflozin@O3 | HIE83@NE2        | 46.21                | 2.86                       | 151.76                  |
| Empagliflozin@O6 | TYR526@OH        | 37.18                | 2.77                       | 151.62                  |
| GLN457@OE1       | Empagliflozin@O5 | 34.25                | 2.80                       | 163.77                  |
| Empagliflozin@O3 | ASN78@ND2        | 26.09                | 2.88                       | 158.60                  |
| Empagliflozin@O2 | LYS321@NZ3       | 23.20                | 2.87                       | 156.99                  |
| Empagliflozin@O2 | LYS321@NZ1       | 20.10                | 2.86                       | 157.72                  |
| Empagliflozin@O2 | LYS321@NZ2       | 19.89                | 2.87                       | 157.35                  |
| Empagliflozin@O1 | GLN457@NE2       | 10.12                | 2.91                       | 160.32                  |
| Empagliflozin@O4 | TRP291@NE1       | 9.11                 | 2.90                       | 150.84                  |
| GLU102@OE1       | Empagliflozin@O3 | 1.71                 | 2.85                       | 147.51                  |
| ASN78@O          | Empagliflozin@O3 | 1.56                 | 2.81                       | 156.47                  |
| Empagliflozin@O7 | THR90@OG1        | 0.69                 | 2.86                       | 161.25                  |
| ASN78@OD1        | Empagliflozin@O2 | 0.55                 | 2.83                       | 149.74                  |
| Empagliflozin@O1 | Empagliflozin@O5 | 0.42                 | 2.59                       | 138.30                  |
| GLU102@OE2       | Empagliflozin@O2 | 0.34                 | 2.68                       | 156.80                  |
| Empagliflozin@O3 | LYS321@NZ2       | 0.19                 | 2.88                       | 141.78                  |
| Empagliflozin@O3 | LYS321@NZ1       | 0.18                 | 2.89                       | 141.33                  |
| Empagliflozin@O3 | LYS321@NZ3       | 0.16                 | 2.90                       | 142.36                  |
| THR287@OG1       | Empagliflozin@O5 | 0.11                 | 2.86                       | 154.80                  |
| Empagliflozin@O5 | GLN_441@NE2      | 0.09                 | 2.95                       | 141.52                  |
| Empagliflozin@O4 | ASN78@ND2        | 0.04                 | 2.89                       | 163.99                  |
| MET283@O         | Empagliflozin@O5 | 0.03                 | 2.86                       | 156.01                  |
| PHE101@O         | Empagliflozin@O5 | 0.02                 | 2.87                       | 150.95                  |
| Empagliflozin@O4 | Empagliflozin@O2 | 0.01                 | 2.74                       | 135.43                  |
| Empagliflozin@O2 | ASN78@ND2        | 0.01                 | 2.83                       | 141.98                  |

**Table S10.** The energy component of binding free energy (MM/GBSA method).

| complex(SGLT2) | $\Delta E_{\text{vdw}}$ | $\Delta E_{\text{ele}}$ | $\Delta G_{\text{pol, GB}}$ | $\Delta G_{\text{nonpol}}$ | $\Delta G_{\text{gas}}$ | $\Delta G_{\text{sol}}$ | $\Delta G_{\text{total}}$ |
|----------------|-------------------------|-------------------------|-----------------------------|----------------------------|-------------------------|-------------------------|---------------------------|
| alpha-glucose  | $-16.62 \pm 0.15$       | $-48.78 \pm 0.36$       | $43.95 \pm 0.26$            | $-3.25 \pm 0.01$           | $-65.40 \pm 0.35$       | $40.69 \pm 0.26$        | $-24.70 \pm 0.26$         |
| beta-glucose   | $-11.63 \pm 0.17$       | $-44.23 \pm 0.47$       | $44.63 \pm 0.31$            | $-2.97 \pm 0.01$           | $-55.86 \pm 0.48$       | $41.66 \pm 0.30$        | $-14.20 \pm 0.34$         |
| empagliflozin  | $-58.23 \pm 0.17$       | $-64.36 \pm 0.32$       | $62.70 \pm 0.22$            | $-8.22 \pm 0.01$           | $-122.58 \pm 0.29$      | $54.49 \pm 0.22$        | $-68.10 \pm 0.23$         |
| ertugliflozin  | $-56.97 \pm 0.14$       | $-24.22 \pm 0.33$       | $47.03 \pm 0.24$            | $-7.28 \pm 0.01$           | $-81.19 \pm 0.32$       | $39.74 \pm 0.24$        | $-41.45 \pm 0.25$         |
| LX2761         | $-72.20 \pm 0.20$       | $-49.22 \pm 0.62$       | $67.70 \pm 0.50$            | $-9.70 \pm 0.02$           | $-121.42 \pm 0.56$      | $58.00 \pm 0.50$        | $-63.42 \pm 0.30$         |

<sup>a</sup>All values are in kcal/mol**Table S11.** The energy component of binding free energy (MM/GBSA method).

| complex(SGLT1) | $\Delta E_{\text{vdw}}$ | $\Delta E_{\text{ele}}$ | $\Delta G_{\text{pol, GB}}$ | $\Delta G_{\text{nonpol}}$ | $\Delta G_{\text{gas}}$ | $\Delta G_{\text{sol}}$ | $\Delta G_{\text{total}}$ |
|----------------|-------------------------|-------------------------|-----------------------------|----------------------------|-------------------------|-------------------------|---------------------------|
| alpha-glucose  | $-16.85 \pm 0.13$       | $-31.43 \pm 0.43$       | $42.52 \pm 0.30$            | $-3.03 \pm 0.01$           | $-48.29 \pm 0.38$       | $39.50 \pm 0.30$        | $-8.79 \pm 0.19$          |
| beta-glucose   | $-15.55 \pm 0.15$       | $-42.77 \pm 0.41$       | $45.72 \pm 0.40$            | $-3.40 \pm 0.01$           | $-58.32 \pm 0.36$       | $42.32 \pm 0.40$        | $-16.01 \pm 0.38$         |
| LX2761         | $-82.30 \pm 0.22$       | $-52.46 \pm 0.45$       | $59.10 \pm 0.37$            | $-11.00 \pm 0.02$          | $-134.76 \pm 0.44$      | $48.09 \pm 0.37$        | $-86.67 \pm 0.30$         |
| empagliflozin  | $-54.60 \pm 0.20$       | $-64.44 \pm 0.56$       | $44.74 \pm 0.33$            | $-7.93 \pm 0.01$           | $-119.04 \pm 0.55$      | $36.82 \pm 0.33$        | $-82.23 \pm 0.43$         |

<sup>a</sup>All values are in kcal/mol

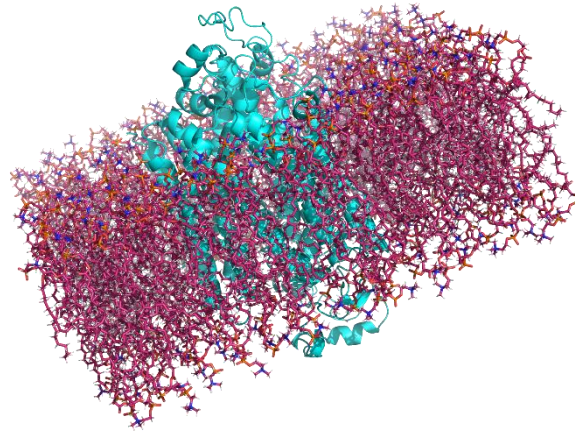

**Fig. S1.** The model of the membrane protein of SGLT2. the protein is inserted into DOPC lipid bilayer used by CHARMM-GUI. lipid bilayer was colored in pink and blue with stick representation. Sodium-dependent glucose cotransporters (SGLT) was colored cyan in cartoon representation. The same is true in the SGLT1 system



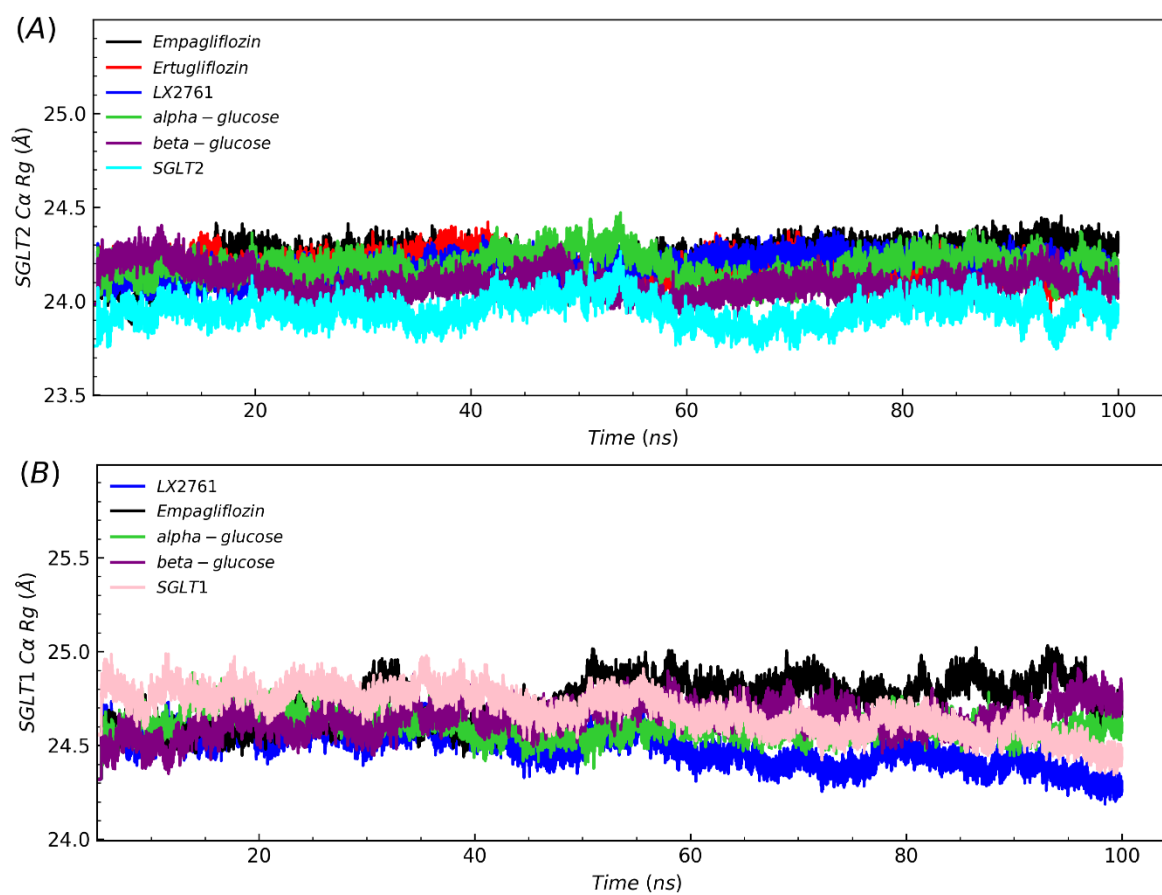

Fig. S2. The radius of gyration (Rg) of (A)SGLT2, (B)SGLT1.

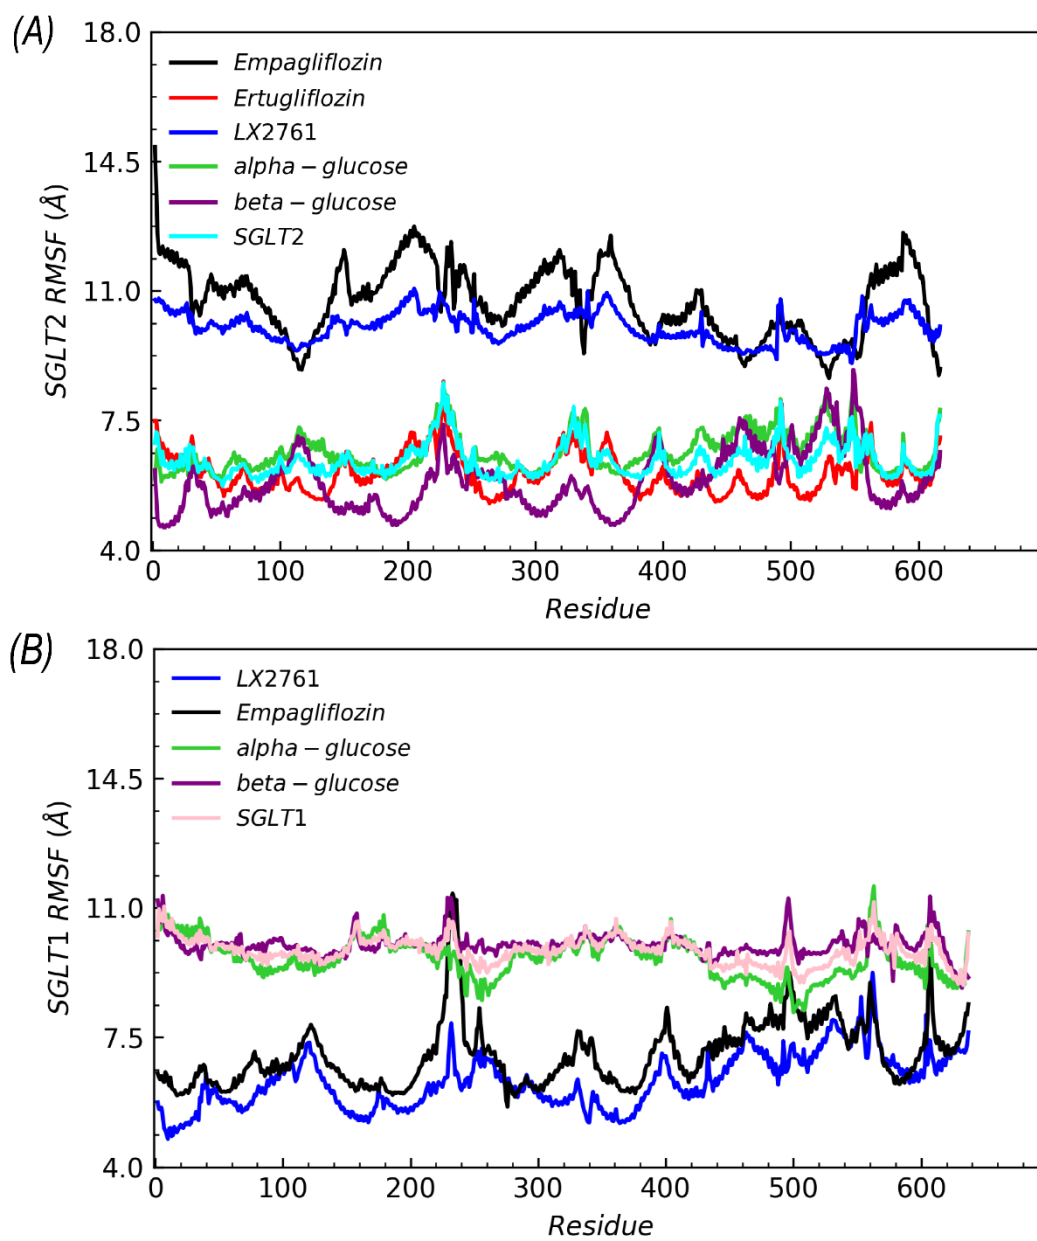

Fig. S3. The root-mean-square fluctuation (RMSF) of (A)SGLT2, (B)SGLT1.

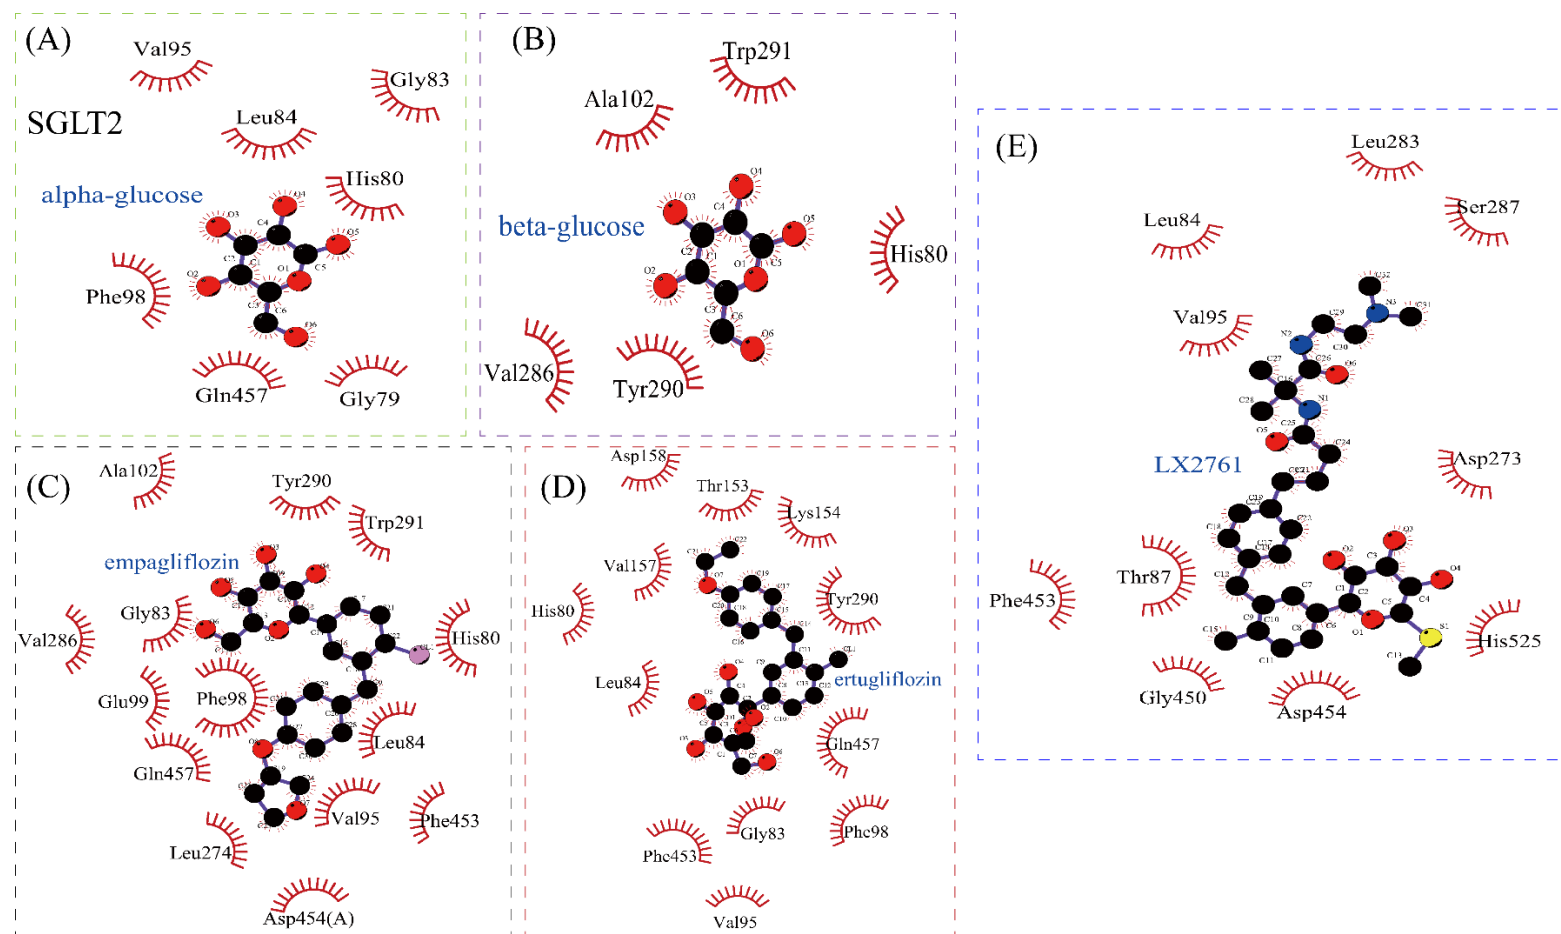

**Fig.S4.** The hydrophobic interaction between the five ligands bounded at the SGLT2. The stick (in the middle) and red arc represented ligands and SGLT2 residues, respectively. (A) SGLT2-alpha-glucose complex. (B) SGLT2-beta-glucose complex. (C) SGLT2-Empagliflozin complex. (D) SGLT2-Ertugliflozin complex. (E) SGLT2-LX2761 complex.

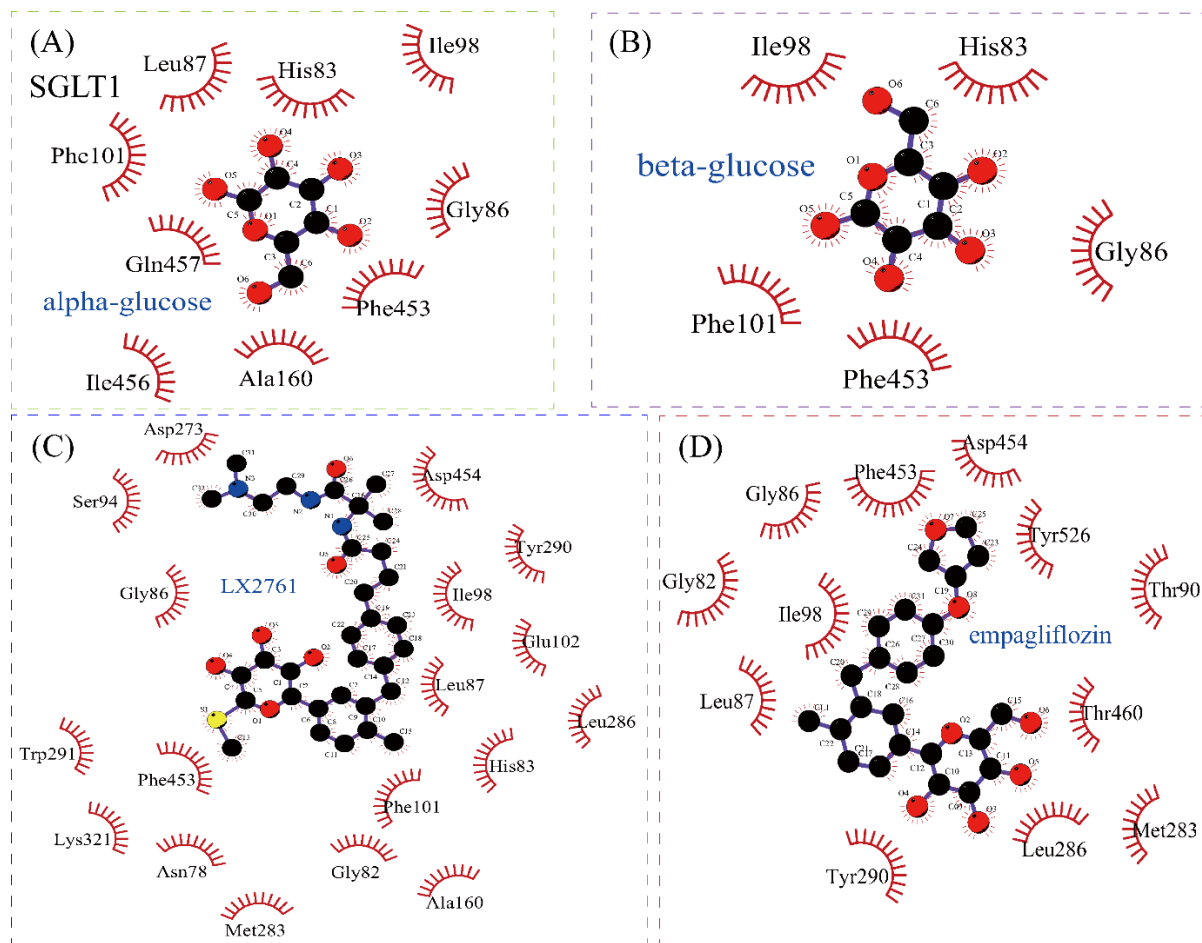

**Fig.S5.** The hydrophobic interaction between the four ligands bounded at the SGLT1. The stick (in the middle) and red arc represented ligands and SGLT1 residues, respectively. (A) SGLT1-alpha-glucose complex. (B) SGLT1-beta-glucose complex. (C) SGLT1-LX2761 complex. (D) SGLT1-Empagliflozin complex.

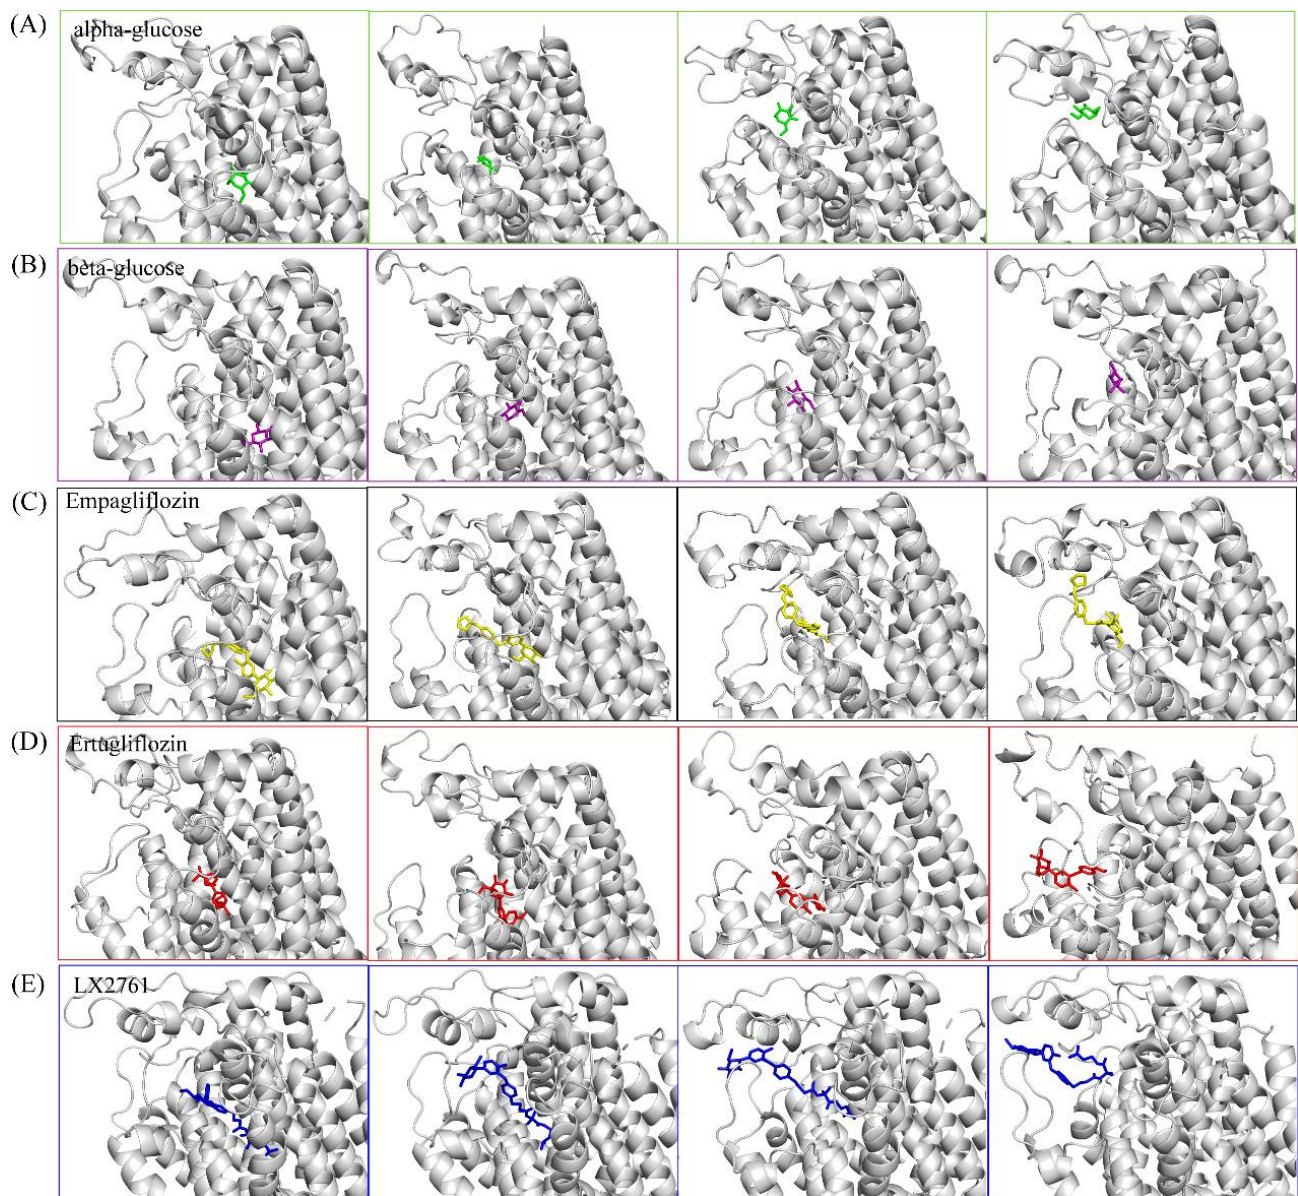

**Fig.S6.** Intermediate snapshots of the five systems during PMF simulations, SGLT2 and ligand are represented as gray cartoons and colored sticks, respectively. The selected windows are respectively 1, 20, 40, 50ns. All molecules move between TM1b, TM2, TM6a and TM10. (A) SGLT2-alpha-glucose system, alpha-glucose is in green. (B) SGLT2-beta-glucose system, beta-glucose is in purple. (C) SGLT2-Empagliflozin system, empagliflozin is yellow. (D) SGLT2-Ertugliflozin system, ertugliflozin in red. (E) SGLT2-LX2761 system, LX2761 in blue.

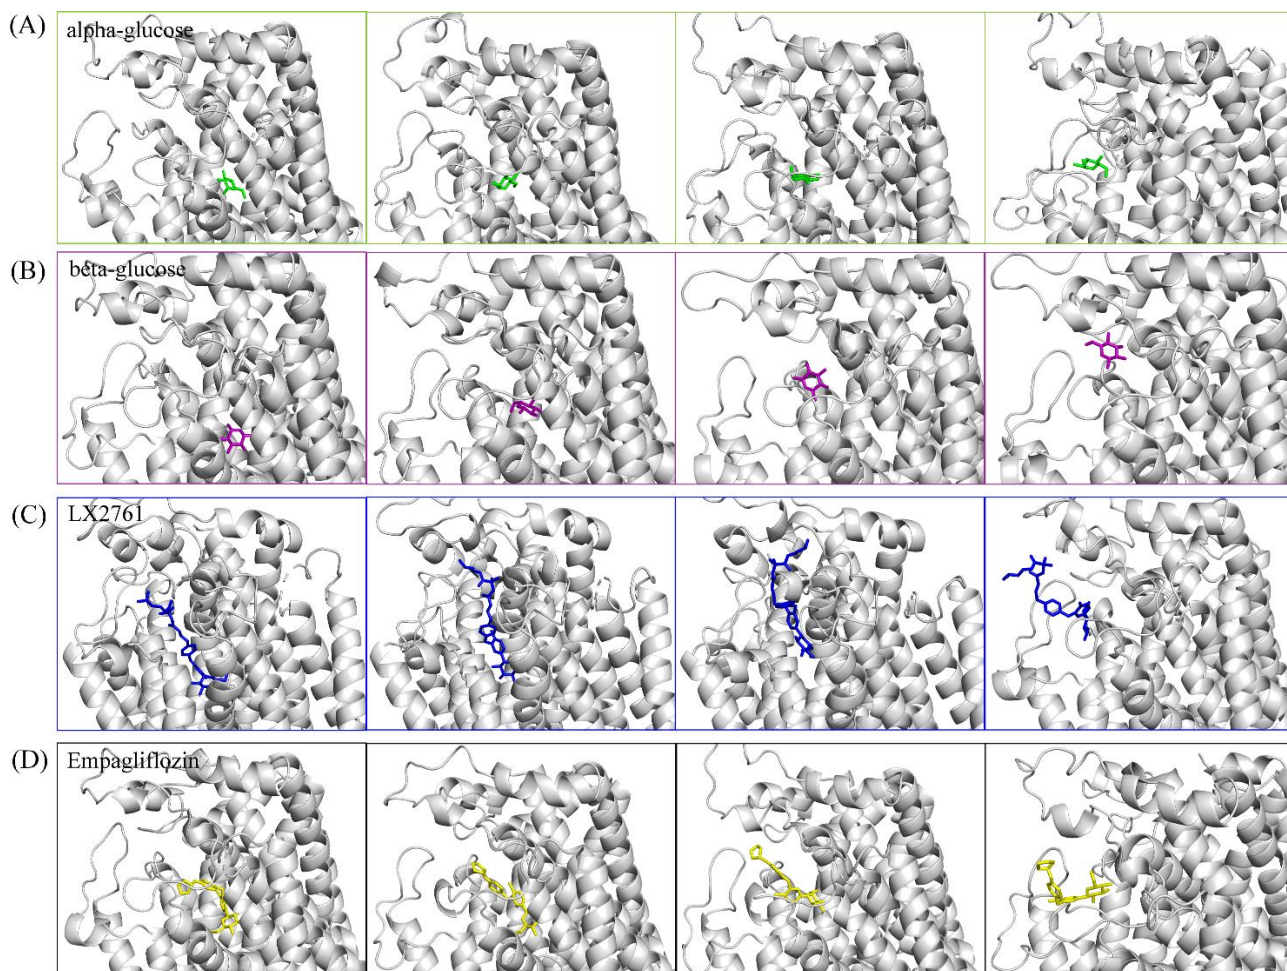

**Fig.S7.** Intermediate snapshots of the four systems during PMF simulations, SGLT1 and ligand are represented as gray cartoons and colored sticks, respectively. The selected windows are respectively 1, 20, 40, 50ns. All molecules move between M1b, M2, M6a and M10. (A) SGLT1-alpha-glucose system, alpha-glucose is in green. (B) SGLT1-beta-glucose system, beta-glucose is in purple. (C) SGLT1-LX2761 system, LX2761 in blue. (D) SGLT1-Empagliflozin system, empagliflozin is yellow.
